# Supplementary material for: STAT5B mutations in myeloid neoplasms differ by disease subtypes but characterize a subset of chronic myeloid neoplasms with eosinophilia and/or basophilia
Source: PubMed Central journal article supplement — Haematologica. 2023 Nov 16;109(6):1825–35. doi: 10.3324/haematol.2023.284311 (PMC11141669; doi:10.3324/haematol.2023.284311), 2023-11-16
Supplement: 2023_284311_YIN_SUPPL.pdf [file 2023_284311_YIN_SUPPL.pdf]

# *STAT5B* mutations in myeloid neoplasms differ by disease subtypes but characterize a subset of chronic myeloid neoplasms with eosinophilia and/or basophilia

C. Cameron Yin,<sup>1</sup> Wayne Tam,<sup>2</sup> Serena M. Walker,<sup>3</sup> Amandeep Kaur,<sup>4</sup> Madhu M. Ouseph,<sup>5</sup> Wei Xie,<sup>6</sup> Olga K. Weinberg,<sup>7</sup> Peng Li,<sup>8</sup> Zhuang Zuo,<sup>1</sup> Mark J. Routbort,<sup>1</sup> Simon Chen,<sup>3</sup> L. Jeffrey Medeiros,<sup>1</sup> Tracy I. George,<sup>8</sup> Attilio Orazi,<sup>9</sup> Daniel A. Arber,<sup>4</sup> Adam Bagg,<sup>3</sup> Robert P. Hasserjian<sup>10</sup> and Sa A. Wang<sup>1</sup>

<sup>1</sup>Department of Hematopathology, University of Texas MD Anderson Cancer Center, Houston, TX; <sup>2</sup>Division of Hematopathology, Department of Pathology and Laboratory Medicine, Donald and Barbara Zucker School of Medicine, Hofstra/Northwell, Greenvale, NY; <sup>3</sup>Department of Pathology and Laboratory Medicine, University of Pennsylvania, Philadelphia, PA; <sup>4</sup>Department of Pathology, University of Chicago, Chicago, IL; <sup>5</sup>Department of Pathology and Laboratory Medicine, Weill Cornell Medical Center, New York, NY; <sup>6</sup>Department of Pathology & Laboratory Medicine, Oregon Health & Science University, Portland, OR; <sup>7</sup>Department of Pathology, University of Texas Southwestern Medical Center, Dallas, TX; <sup>8</sup>Department of Pathology, University of Utah, Salt Lake City, UT; <sup>9</sup>Department of Pathology, Texas Tech University, El Paso, TX and <sup>10</sup>Department of Pathology, Massachusetts General Hospital, Boston, MA, USA

**Correspondence:** S.A. Wang  
[Swang5@mdanderson.org](mailto:Swang5@mdanderson.org)

C.C. Yin  
[cyin@mdanderson.org](mailto:cyin@mdanderson.org)

**Received:** September 17, 2023.

**Accepted:** November 9, 2023.

**Early view:** November 16, 2023.

<https://doi.org/10.3324/haematol.2023.284311>

©2024 Ferrata Storti Foundation

Published under a CC BY-NC license

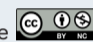

**Supplemental table 1**

| <b>ID</b> | <b>STAT5B mutation</b> | <b>VAF (%)</b> |
|-----------|------------------------|----------------|
|-----------|------------------------|----------------|

**MDS**

|    |                   |       |
|----|-------------------|-------|
| 1  | c.1924A>C p.N642H | 13.96 |
| 2  | c.1909G>A p.E637K | 1.51  |
| 3  | c.1924A>C p.N642H | 14.8  |
| 4  | c.2018G>A p.R673Q | 31.55 |
| 5  | c.1924A>C p.N642H | 47.5  |
| 6  | c.1924A>C p.N642H | 20.78 |
| 7  | c.1924A>C p.N642H | 38.31 |
| 8  | c.1924A>C p.N642H | 58.19 |
| 9  | c.1924A>C p.N642H | 43.82 |
| 10 | c.1924A>C p.N642H | 1.76  |
| 11 | c.1924A>C p.N642H | 2.03  |
| 12 | c.1924A>C p.N642H | 51.2  |
| 13 | c.1924A>C p.N642H | 30.2  |
| 14 | c.1924A>C p.N642H | 29.3  |
| 15 | c.1924A>C p.N642H | 22    |
| 16 | c.1924A>C p.N642H | 9.5   |
| 17 | c.1903T>A p.S635T | 2.8   |
| 18 | c.1924A>C p.N642H | 1.6   |
| 19 | c.2117A>T p.Q706L | 9     |
| 20 | c.1882A>T p.T628S | 24.6  |
| 21 | c.1924A>C p.N642H | 51    |
| 22 | c.2110A>C p.I704L | 8     |
| 23 | c.1882A>T p.T628S | 49    |

**AML**

|    |                   |       |
|----|-------------------|-------|
| 1  | c.1924A>C p.N642H | 4.43  |
| 2  | c.1924A>C p.N642H | 1.88  |
| 3  | c.1972G>A p.D658N | 46.42 |
| 4  | c.1924A>C p.N642H | 31.49 |
| 5  | c.1924A>C p.N642H | 4.55  |
| 6  | c.1924A>C p.N642H | 6.99  |
| 7  | c.1924A>C p.N642H | 3.79  |
| 8  | c.1924A>C p.N642H | 45.2  |
| 9  | c.1924A>C p.N642H | 16    |
| 10 | c.1924A>C p.N642H | 32.3  |
| 11 | c.1924A>C p.N642H | 5.1   |
| 12 | c.1883C>G p.T628S | 1.1   |
| 13 | c.1924A>C p.N642H | 11    |

|    |                    |      |
|----|--------------------|------|
| 14 | c.2135T>A, p.V712E | 4.9  |
| 15 | c.1924A>C p.N642H  | 5.5  |
| 16 | c.1924A>C p.N642H  | 42.5 |
| 17 | c.1924A>C p.N642H  | 10   |
| 18 | c.1924A>C p.N642H  | 7    |
| 19 | c.1924A>C p.N642H  | 51   |
| 20 | c.1924A>C p.N642H  | 5    |
| 21 | c.863A>T p.Q288L   | 53   |

#### MPN

|    |                   |       |
|----|-------------------|-------|
| 1  | c.1924A>C p.N642H | 4.46  |
| 2  | c.1924A>C p.N642H | 4.03  |
| 3  | c.1924A>C p.N642H | 2.65  |
| 4  | c.1994A>T p.Y665F | 31.55 |
| 5  | c.1924A>C p.N642H | 3.41  |
| 6  | c.1924A>C p.N642H | 33.03 |
| 7  | c.1994A>T p.Y665F | 1.41  |
| 8  | c.1924A>C p.N642H | 11    |
| 9  | c.1924A>C p.N642H | 50    |
| 10 | c.1994A>T p.Y665F | 7     |

#### MDS/MPN

|    |                    |       |
|----|--------------------|-------|
| 1  | c.1924A>C p.N642H  | 2.8   |
| 2  | c.1994A>T p.Y665F  | 18.6  |
| 3  | c.1924A>C p.N642H  | 41.95 |
| 4  | c.1924A>C p.N642H  | 5.2   |
| 5  | c.1924A>C p.N642H  | 47.95 |
| 6  | c.1924A>C p.N642H  | 49.93 |
| 7  | c.1924A>C p.N642H  | 28.3  |
| 8  | c.1994A>T p.Y665F  | 15.6  |
| 9  | c.1924A>C p.N642H  | 4.9   |
| 10 | c.1924A>C p.N642H  | 4.2   |
| 11 | c.1924A>C, p.N642H | 5.5   |
| 12 | c.1924A>C p.N642H  | 43    |
| 13 | c.1909G>A p.E637K  | 49.2  |
| 14 | c.1924A>C p.N642H  | 1.46  |
| 15 | c.1924A>C p.N642H  | 57.2  |

#### CEL-NOS

|   |                   |       |
|---|-------------------|-------|
| 1 | c.1924A>C p.N642H | 78.5  |
| 2 | c.1924A>C p.N642H | 45.39 |

|    |                   |       |
|----|-------------------|-------|
| 3  | c.1924A>C p.N642H | 37.1  |
| 4  | c.1924A>C p.N642H | 61.26 |
| 5  | c.1924A>C p.N642H | 47.95 |
| 6  | c.1924A>C p.N642H | 35.9  |
| 7  | c.1994A>T p.Y665F | 38.8  |
|    | c.1282G>A p.D428N | 29.6  |
| 8  | c.1924A>C p.N642H | 7     |
| 9  | c.1924A>C p.N642H | 46    |
| 10 | c.1924A>C p.N642H | 23    |
| 11 | c.1924A>C p.N642H | 43    |
| 12 | c.1924A>C p.N642H | 49    |

#### SM

|   |                   |      |
|---|-------------------|------|
| 1 | c.1924A>C p.N642H | 43.7 |
|---|-------------------|------|

#### Supplemental table 2

| STAT5B mutation    | MDS (23) | AML | MPN | MDS/MPN | CEL-NOS | SM | in COSMIC | Somatic | Activating | Previously reported cases          |
|--------------------|----------|-----|-----|---------|---------|----|-----------|---------|------------|------------------------------------|
| c.1924A>C p.N642H  | 16 (70%) | 17  | 7   | 12      | 11      | 1  | Yes       | Yes     | Yes        | Most common hot spots              |
| c.863A>T p.Q288L   | 0        | 1   | 0   | 0       | 0       | 0  | Yes       | Unknown | Unknown    | bile duct adenocarcinoma           |
| c.1282G>A p.D428N  | 0        | 0   | 0   | 0       | 1       | 0  | No        | Unknown | Unknown    | None                               |
| c.1882A>T p.T628S  | 2        | 1   | 0   | 0       | 0       | 0  | Yes       | Yes     | Unknown    | B-ALL, MDS-RS, T-ALL, T-LGL, T-PLL |
| c.1903T>A p.S635T  | 1        | 0   | 0   | 0       | 0       | 0  | No        | Unknown | Unknown    | None                               |
| c.1909G>A p.E637K  | 1        | 0   | 0   | 1       | 0       | 0  | No        | Unknown | Unknown    | None                               |
| c.1972G>A p.D658N  | 0        | 1   | 0   | 0       | 0       | 0  | Yes       | Yes     | Unknown    | breast carcinoma                   |
| c.1994A>T p.Y665F  | 0        | 0   | 3   | 2       | 1       | 0  | Yes       | Yes     | Yes        | T-ALL, HSTCL, MF/SS, T-LGL, T-PLL  |
| c.2018G>A p.R673Q  | 1        | 0   | 0   | 0       | 0       | 0  | No        | Unknown | Unknown    | None                               |
| c.2110A>C p.I704L  | 1        | 0   | 0   | 0       | 0       | 0  | Yes       | Yes     | Yes        | T-LGL                              |
| c.2117A>T p.Q706L  | 1        | 0   | 0   | 0       | 0       | 0  | Yes       | Yes     | Unknown    | GI adenocarcinoma, T-LGL, T-PLL    |
| c.2135T>A, p.V712E | 0        | 1   | 0   | 0       | 0       | 0  | Yes       | Yes     | Unknown    | MF/SS, MDS-RS, T-ALL, T-LGL,       |
